# Supplementary material for: Youth Firearm Mortality in the Americas From 2015 to 2022
Source: PubMed Central journal article supplement (PMC11447584; doi:10.1001/jamanetworkopen.2024.37395), 2024-10-02
Supplement: jamanetwopen-e2437395-s002.pdf [file jamanetwopen-e2437395-s002.pdf]

## Data Sharing Statement

Degli Esposti. Youth Firearm Mortality in the Americas From 2015 to 2022. *JAMA Netw Open*. Published October 02, 2024. doi:10.1001/jamanetworkopen.2024.37395

### Data

**Data available:** No

### Additional Information

**Explanation for why data not available:** The data are already publicly available from the primary data sources. Upon request to corresponding author, we will provide the aggregated data used in this research letter.
